# Supplementary material for: Above-treeline ecosystems facing drought: lessons from the 2022 European summer heat wave
Source: Copernicus journal article supplement (doi:10.5194/bg-20-4259-2023), 2023-10-18
Supplement: Supplementary file 1 [file bg-20-4259-2023-supplement.pdf]

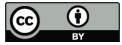

*Supplement of*

## **Above-treeline ecosystems facing drought: lessons from the 2022 European summer heat wave**

**Philippe Choler**

*Correspondence to:* Philippe Choler ([philippe.choler@univ-grenoble-alpes.fr](mailto:philippe.choler@univ-grenoble-alpes.fr))

The copyright of individual parts of the supplement might differ from the article licence.

Supplement tables and figures

**Supplement Table S1: Breakdown of MODIS pixels and ERA5-land cells per bioclimate cluster with indication of land cover (from 100m-resolution Copernicus Global Land Cover) and long-term average MODIS-derived NDVI<sub>max</sub> value for the 2000-2022 period.**

|                    |       | Number of MODIS pixels | Number of ERA5 cells | Land cover (CGLS_LC)  |                   | Mean NDVI <sub>max</sub> (2000-2022) |               |                |
|--------------------|-------|------------------------|----------------------|-----------------------|-------------------|--------------------------------------|---------------|----------------|
|                    |       |                        |                      | Herbaceous vegetation | Sparse vegetation | [0.15-0.35[                          | [0.35-0.55[   | [0.55-0.75[    |
| Bioclimate cluster | 1     | 36205 (41.8%)          | 143                  | 31491 (87%)           | 4714 (13%)        | 7495 (20.7%)                         | 13583 (37.5%) | 15127 (41.8%)  |
|                    | 2     | 42471 (35%)            | 163                  | 33261 (78.3%)         | 9210 (21.7%)      | 11370 (26.8%)                        | 16236 (38.2%) | 14865 (35%)    |
|                    | 3     | 23264 (80.7%)          | 117                  | 22431 (96.4%)         | 833 (3.6%)        | 419 (1.8%)                           | 4082 (17.5%)  | 18763 (80.7%)  |
|                    | 4     | 40897 (61.1%)          | 203                  | 36900 (90.2%)         | 3997 (9.8%)       | 3493 (8.5%)                          | 12436 (30.4%) | 24968 (61.1%)  |
|                    | 5     | 55179 (33.3%)          | 226                  | 42820 (77.6%)         | 12359 (22.4%)     | 15804 (28.6%)                        | 20988 (38%)   | 18387 (33.3%)  |
|                    | 6     | 29302 (72%)            | 201                  | 27215 (92.9%)         | 2087 (7.1%)       | 1340 (4.6%)                          | 6875 (23.5%)  | 21087 (72%)    |
|                    | Total | 227318                 | 1053                 | 194118 (85.4%)        | 33200 (14.6%)     | 39921 (17.6%)                        | 74200 (32.6%) | 113197 (49.8%) |

5

**Supplement Table S2. Estimates, confidence intervals (CI) and significance (p) of the fixed effects of the selected linear mixed-effect model. Note that because of missing data, the number of ERA5 cells is slightly lower than the one reported in Supp. Table 1.**

| Predictors             | NDVI <sub>max</sub> |               |        |
|------------------------|---------------------|---------------|--------|
|                        | Estimates           | CI            | p      |
| (Intercept)            | -0.03               | -0.04 – -0.02 | <0.001 |
| MSE                    | 0.12                | 0.06 – 0.17   | <0.001 |
| WBA                    | 0.2                 | 0.14 – 0.26   | <0.001 |
| T2M                    | 0.15                | 0.09 – 0.21   | <0.001 |
| WBA * T2M              | -0.02               | -0.03 – -0.01 | 0.001  |
| N <sub>era5.cell</sub> | 1041                |               |        |
| N <sub>CLUST</sub>     | 6                   |               |        |
| Observations           | 23943               |               |        |

10

15 **Supplement Table S3. Performance and estimates of the linear mixed-effect model for different NDVI curve fitting methods. The comparison was made for the retained model structure as shown in Table 1. The line in bold refers to the method used for the main figures. All fixed effects were significant, irrespective of the curve fitting method. See Material and methods for details.**

| Type of smoother    | Parameter (frame for SG, lambda for WH) | Number of iterations | Marginal variance (%) | Conditional variance (%) | Predictors  |             |             |              |
|---------------------|-----------------------------------------|----------------------|-----------------------|--------------------------|-------------|-------------|-------------|--------------|
|                     |                                         |                      |                       |                          | MSE         | WBA         | T2M         | WBA * T2M    |
| Savitzky-Golay (SG) | 7                                       | 3                    | 9.3                   | 14.1                     | 0.13        | 0.20        | 0.15        | -0.01        |
|                     | <b>7</b>                                | <b>5</b>             | <b>9.1</b>            | <b>14.7</b>              | <b>0.12</b> | <b>0.20</b> | <b>0.15</b> | <b>-0.02</b> |
|                     | 14                                      | 3                    | 8.8                   | 13.9                     | 0.13        | 0.19        | 0.15        | -0.01        |
|                     | 14                                      | 5                    | 8.6                   | 14.3                     | 0.11        | 0.19        | 0.15        | -0.02        |
| Whittaker (WH)      | 5                                       | 3                    | 8.7                   | 13.2                     | 0.12        | 0.17        | 0.13        | -0.01        |
|                     | 5                                       | 5                    | 8.6                   | 13.1                     | 0.11        | 0.17        | 0.13        | -0.01        |
|                     | 10                                      | 3                    | 9.0                   | 13.4                     | 0.12        | 0.18        | 0.14        | -0.01        |
|                     | 10                                      | 5                    | 8.7                   | 13.4                     | 0.11        | 0.18        | 0.14        | -0.02        |

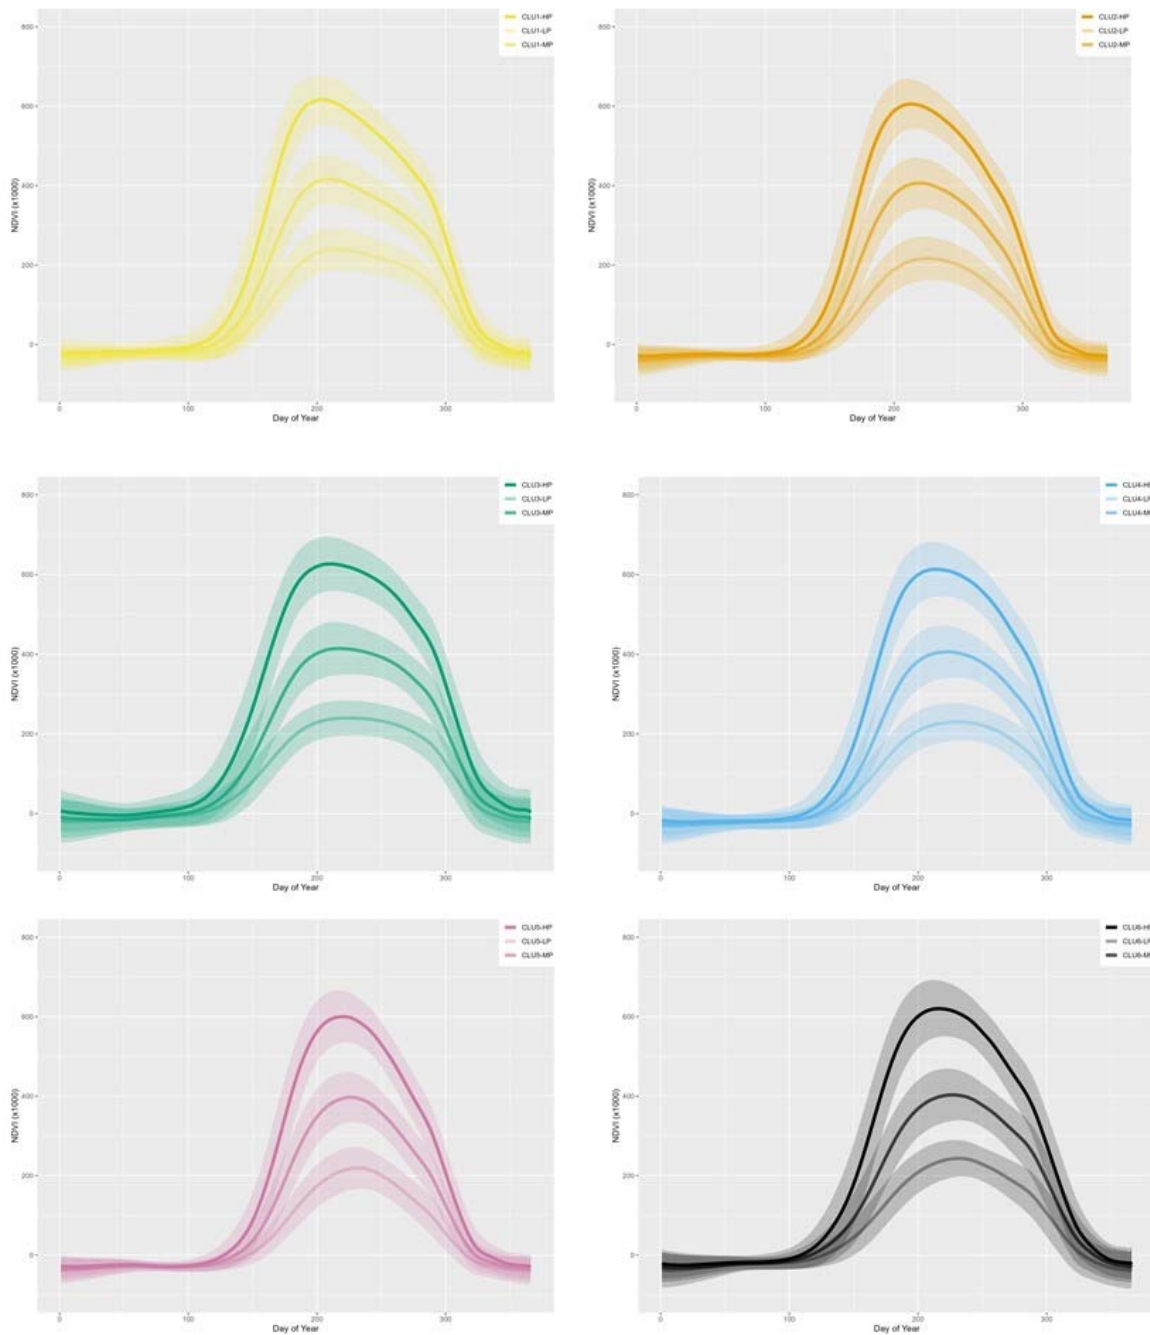

**Supplement Figure S1: Mean and standard deviation of the average yearly time course of NDVI for the selected pixels. To ease reading, data are shown for the six bioclimate clusters and for three ranges of long-term average NDVI<sub>max</sub>. LP: 0.15-0.35; MP: 0.35-0.55; HP: 0.55-0.75. Color legends of clusters are in Figure 1.**

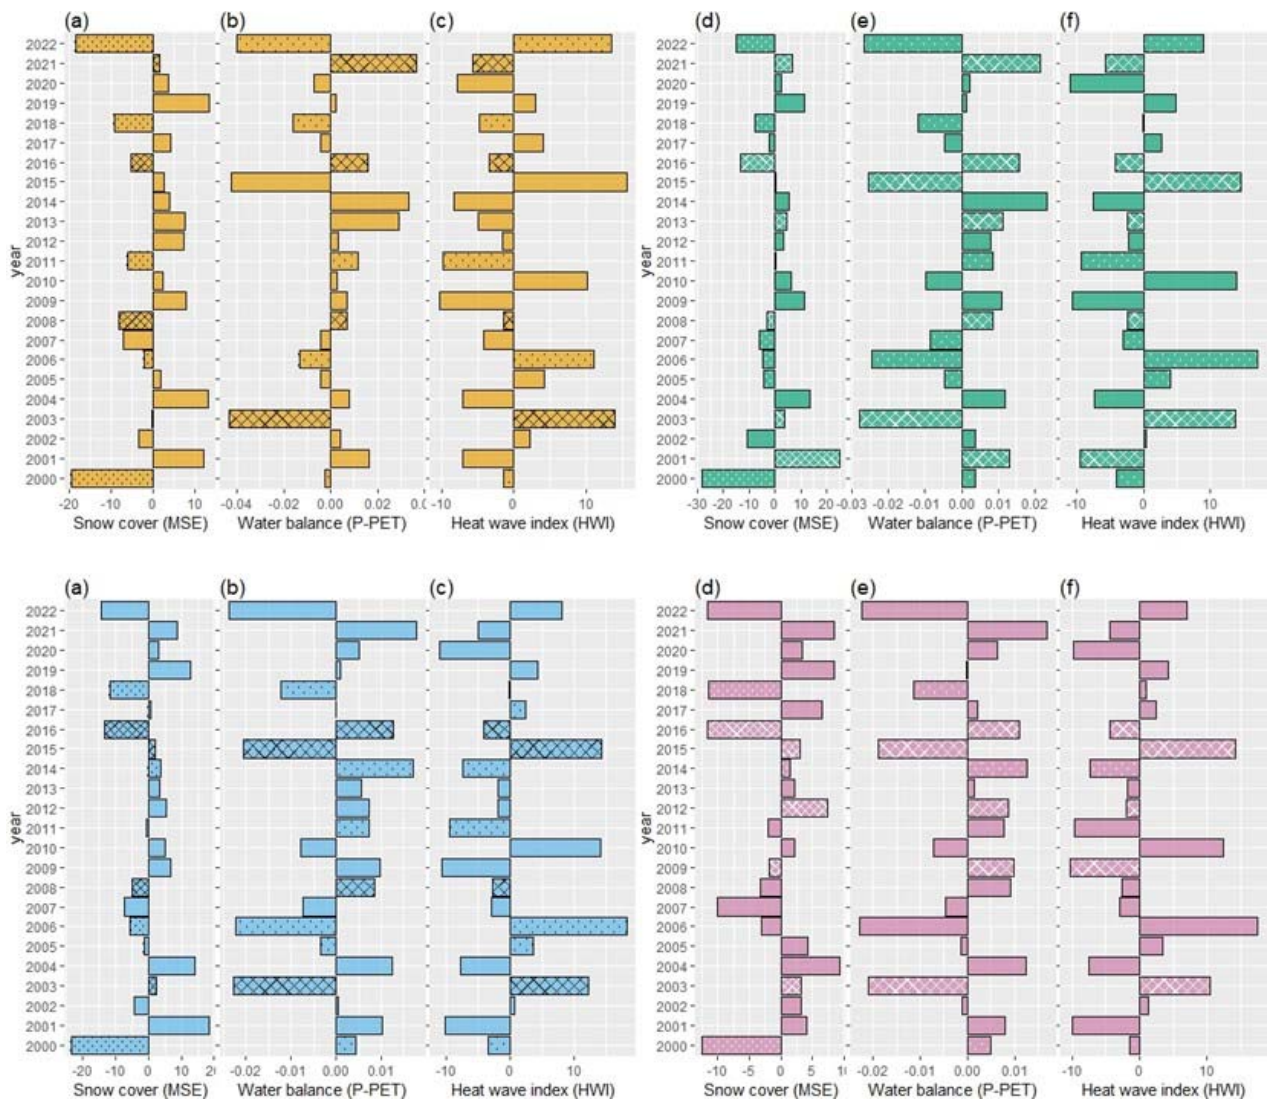

25

**Supplement Figure S2: Anomalies of snow cover duration and early summer meteorological variables for clusters 2,3,4 and 5. Crosshatched (dotted) bars indicate significant positive (negative) NDVImax anomalies. Color legends of clusters are in Figure 1.**
